# Supplementary material
Source: PubMed Central journal article supplement (PMC8591538)
Supplement: EMBJ-40-e108966-s003.pdf [file EMBJ-40-e108966-s003.pdf]

# Appendix

|                                                                                                                        |          |
|------------------------------------------------------------------------------------------------------------------------|----------|
| <b>Appendix Figure S1.</b> Depletion of macrophages in CD169-DTR mice.....                                             | <b>2</b> |
| <b>Appendix Figure S2.</b> CHIKV-E2 mCherry is susceptible to clearance by a poly(I) sensitive scavenger receptor..... | <b>3</b> |
| <b>Appendix Figure S3.</b> LEC Annotations.....                                                                        | <b>4</b> |
| <b>Appendix Figure S4.</b> Mxra8 expression in unassigned LECs.....                                                    | <b>5</b> |

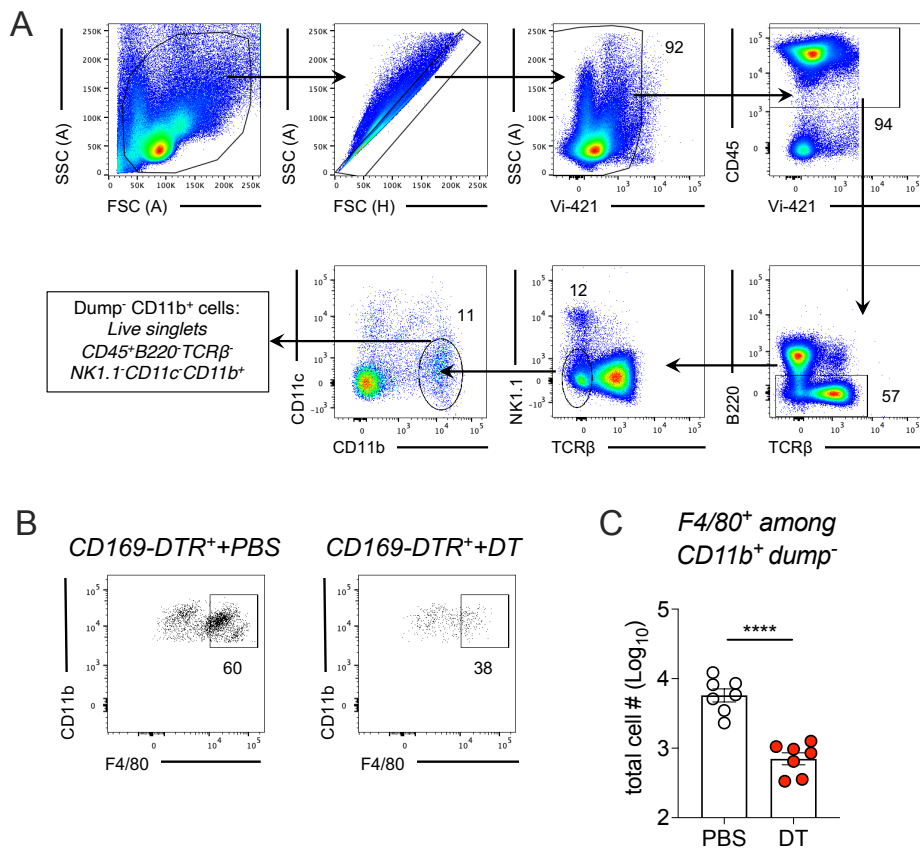

**Appendix Figure S1. Depletion of macrophages in CD169-DTR mice.** CD169-DTR<sup>+</sup> mice were treated i.p. with PBS or DT prior to collection of the popliteal LN. **(A and B)** Representative flow cytometry plots showing the gating scheme used to identify F4/80<sup>+</sup>CD11b<sup>+</sup> macrophages. **(C)** Total numbers of F4/80<sup>+</sup>CD11b<sup>+</sup> macrophages. Mean ± SEM. N=7, one experiment. Unpaired student's t test; \*\*\*\**P* < 0.0001.

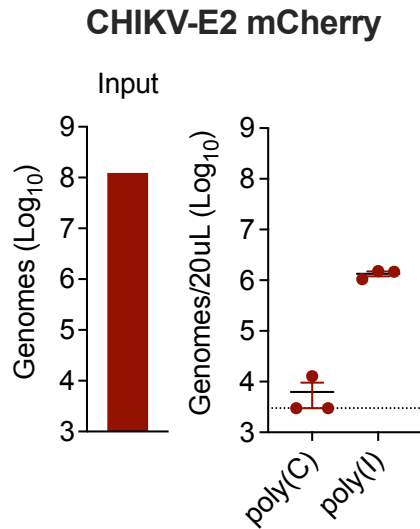

**Appendix Figure S2. CHIKV-E2 mCherry is susceptible to clearance by a poly(I) sensitive scavenger receptor.** WT C57BL/6 mice were treated i.v. with poly(C) or poly(I) 5 min prior to i.v. inoculation of  $10^8$  particles of CHIKV-E2 mCherry. Genomes in the inoculum and serum at 45 min post-inoculation were quantified by RT-qPCR. Mean  $\pm$  SD. N=3, one experiment.

**Figure S3**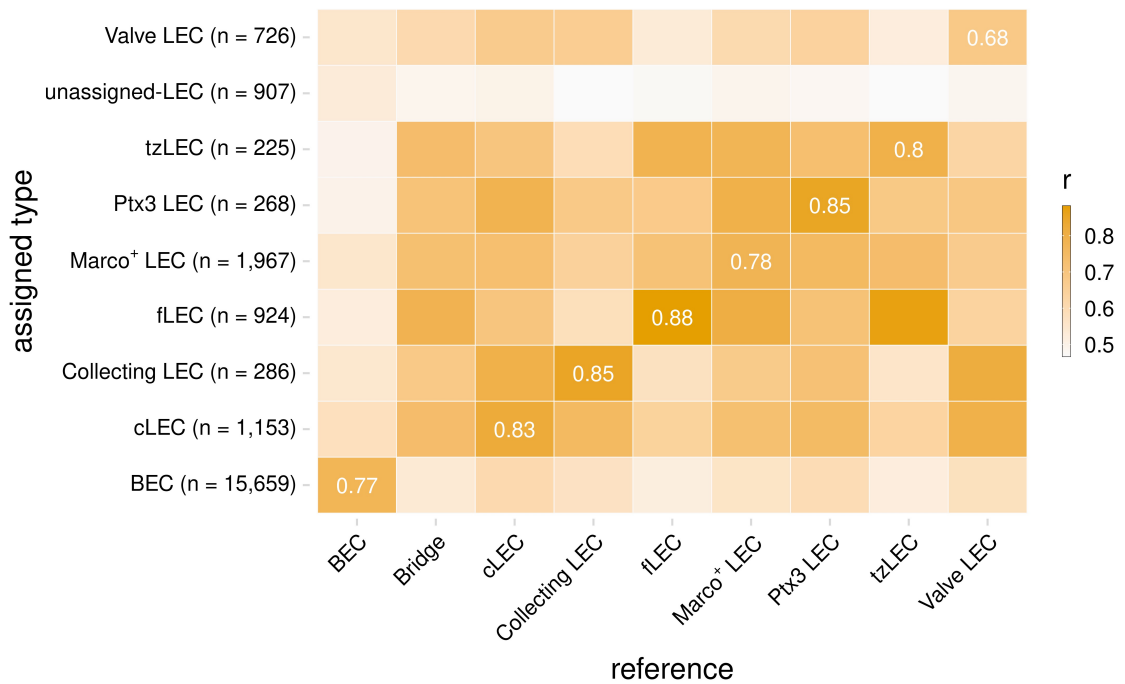

**Appendix Figure S3. LEC Annotations.** To assess the accuracy of endothelial cell type annotations, the subtype assignments were compared back to the reference data. The correlation with the reference RNA-seq data is shown for each subtype. Correlation coefficients (Spearman) are shown for each subtype.

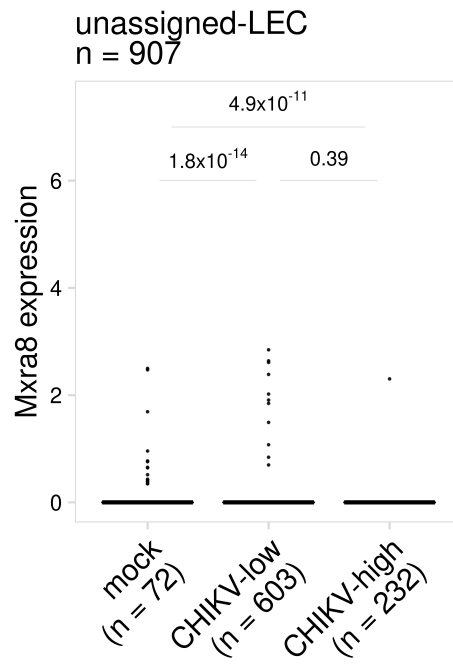

**Appendix Figure S4. Mxra8 expression in unassigned LECs.** Mxra8 expression is shown for unassigned LECs for mock-infected cells and CHIKV-infected cells classified as either CHIKV-low or CHIKV-high. *P* values were calculated using a two-sided Wilcoxon rank-sum test with Bonferroni correction.
